# Supplementary material for: Development and External Validation of a Non-invasive Early Gestational Diabetes Mellitus Prediction Model Integrating Social Network Variables: A Machine Learning-Based Prospective Cohort Study
Source: Research Square preprint supplement (doi:10.21203/rs.3.rs-6854644/v1), 2025-06-25
Supplement: Supplementary file 1 [file 6c41ebb76c638290c99b6ed6.docx]

**Appendix 1：The introduction of general data questionnaire**

The general data questionnaire is divided into two parts: sociodemographic characteristic and individual behavioral characteristic.

1. **Sociodemographic characteristic**

Sociodemographic data include age, height, weight of the first month of pregnancy, blood type, pregnancy times, birth times, gestational week when participating in the study, residence, education level, family monthly income, whether to participate in economic activities, whether to participate in political activities, whether to participate in public welfare activities, whether to have a family history of diabetes, whether to have a history of gestational diabetes, whether to have a history of adverse pregnancy and childbirth, and whether to have multiple pregnancies.

**2. Individual behavioral characteristic**

Individual behavioral data includes the time of the last oral examination, frequency of brushing teeth, whether smoking occurred before pregnancy, whether smoking occurred in the past 30 days, whether passive smoking occurred in the past 30 days, whether drinking alcohol in the past 30 days, frequency of high-intensity physical activity in the past 7 days, frequency of moderate intensity physical activity in the past 7 days, self-evaluation of dietary habits, frequency of consuming dark vegetables, light vegetables, eggs, dairy products, fruits, coarse grains, potatoes, meat, river food, seafood, beans and soy products, and nuts in the past 7 days.
