# Supplementary material for: Development and External Validation of a Non-invasive Early Gestational Diabetes Mellitus Prediction Model Integrating Social Network Variables: A Machine Learning-Based Prospective Cohort Study
Source: Research Square preprint supplement (doi:10.21203/rs.3.rs-6854644/v1), 2025-06-25
Supplement: Supplementary file 2 [file a5805a94ee6a4a0bd85cf3fc.docx]

**Appendix 2：The introduction of name-generator questionnaire**

The name-generator questionnaire is divided into two dimensions: structural network and functional network. Structural network involves the type, scale and intensity of the relationships in the social network. Functional networks focus on the types of support provided by network members, including practical support, informational support, and emotional support.

The first part of the questionnaire explores the functional network dimension through six questions, each allowing 0 to 5 social network members to be listed, except for the last question, which asks for a maximum of ten people to be listed. From these questions, the number of people providing informational, practical, and emotional support can be calculated to assess the size of the functional network.

The second part of the questionnaire analyzed the structural network dimension, asking the subjects to identify which social network members are family members, friends, neighbors or colleagues, etc., and then calculated the proportion of different types of social network members. The sum of all nominated social network members reflects the size of the structural network.

In addition, the questionnaire analyzed the proportion of members with medical background in the network and the total number of contacts of the subjects within six months by asking "which members of the social network are engaged in medical related work or have a medical background" and "the frequency of contact of social network members". This information contributes to the in-depth understanding of the composition and function of social networks and provides important dimensional analysis for research.
